# Supplementary material for: Cell adhesion control by photoinduced LCST shift of PNIPAAm-based brush scaffolds
Source: Royal Society of Chemistry journal article supplement (doi:10.1039/c9tb02958c), 2020-01-01
Supplement: c9tb02958c1.pdf [file c9tb02958c1.pdf]

# Electronic Supplementary Information

## Cell adhesion control by photoinduced LCST shift of PNIPAAm-based brush scaffolds

Keiichi Imato, Kazuho Nagata, Rina Watanabe and Naoya Takeda \*

Department of Life Science and Medical Bioscience, Graduate School of Advanced Science and Engineering, Waseda University (TWIns)

\*E-mail: ntakeda@waseda.jp

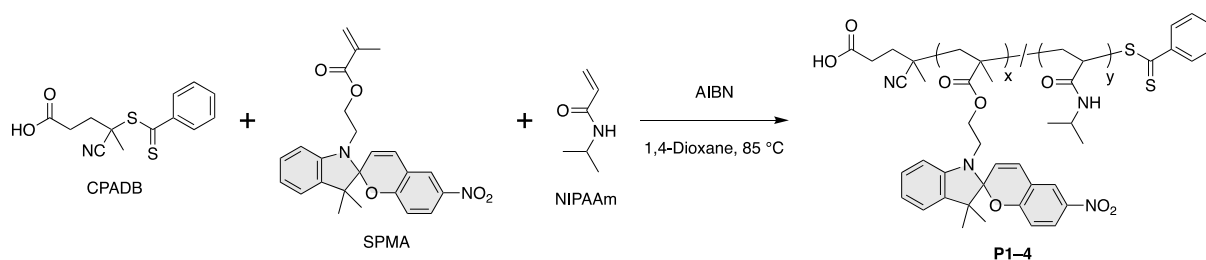

**Fig. S1** Synthetic scheme for photoresponsive PNIPAAms **P1–4** via RAFT polymerization.

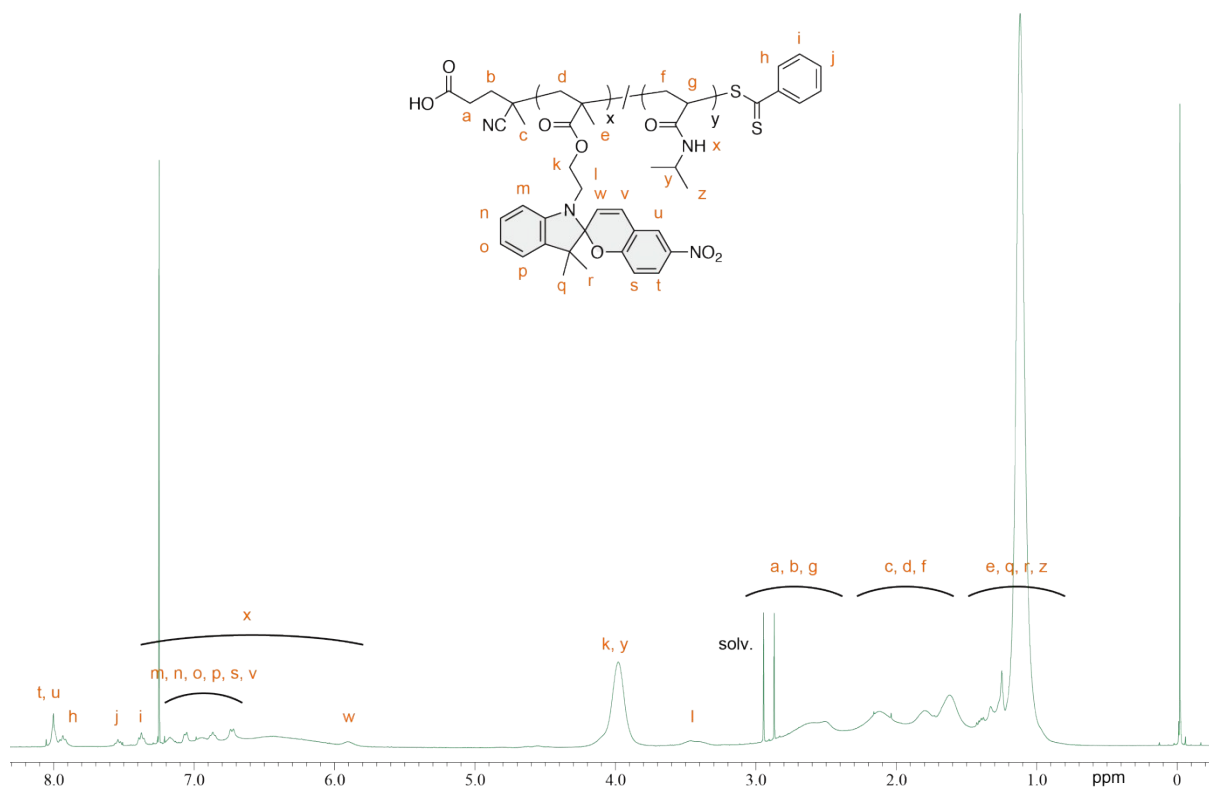

**Fig. S2** <sup>1</sup>H NMR spectrum of **P1**.

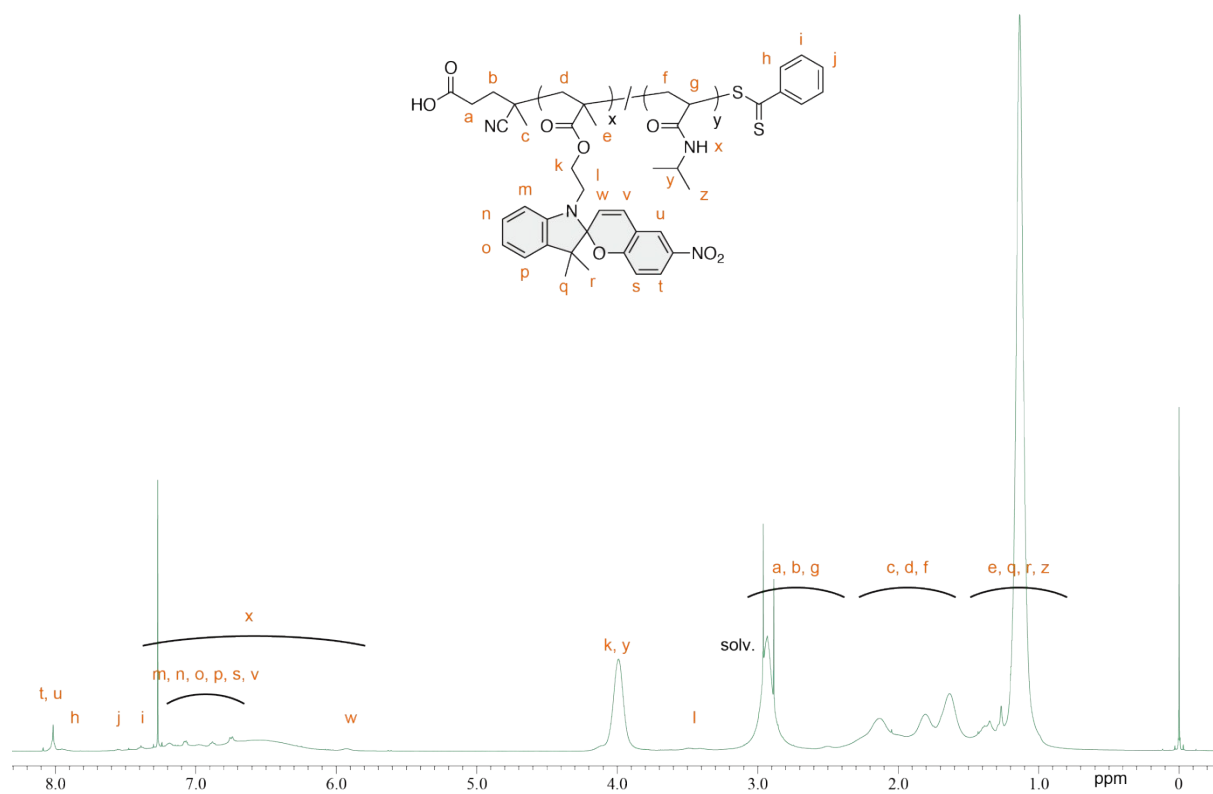

**Fig. S3**  $^1\text{H}$  NMR spectrum of **P2**.

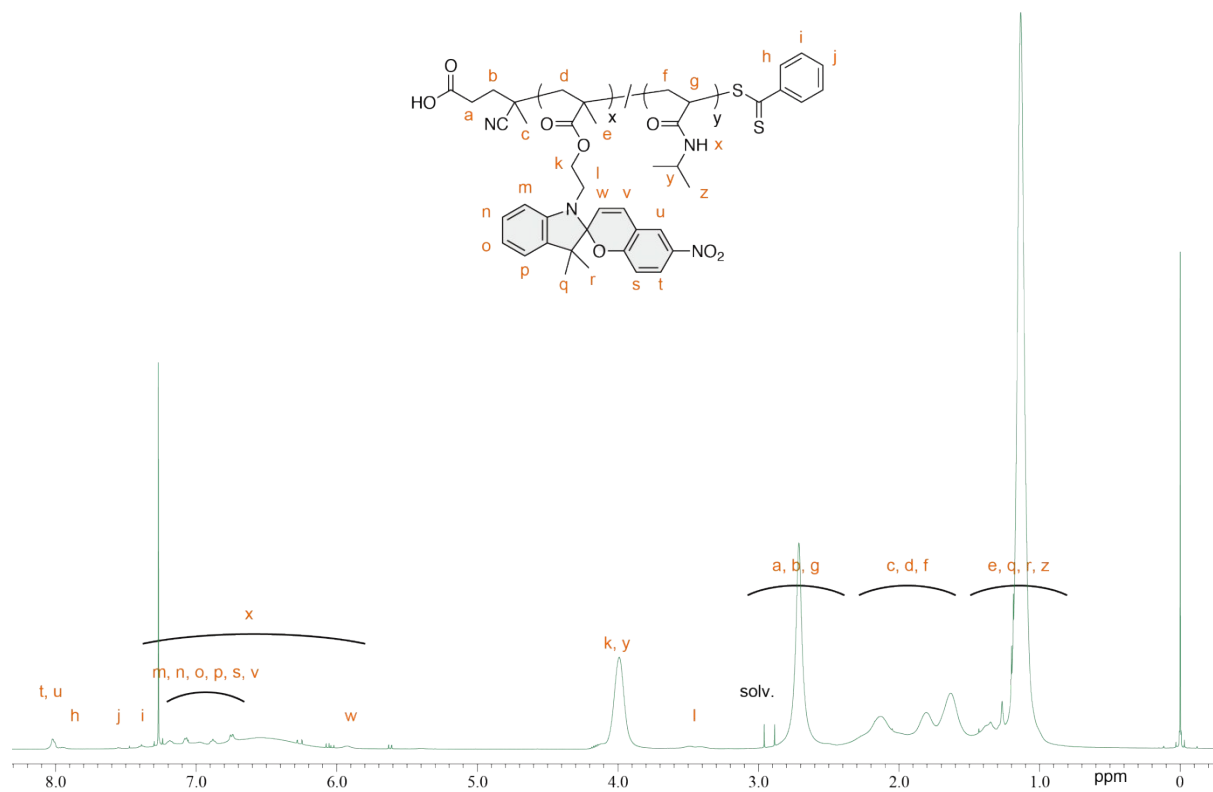

**Fig. S4**  $^1\text{H}$  NMR spectrum of **P3**.

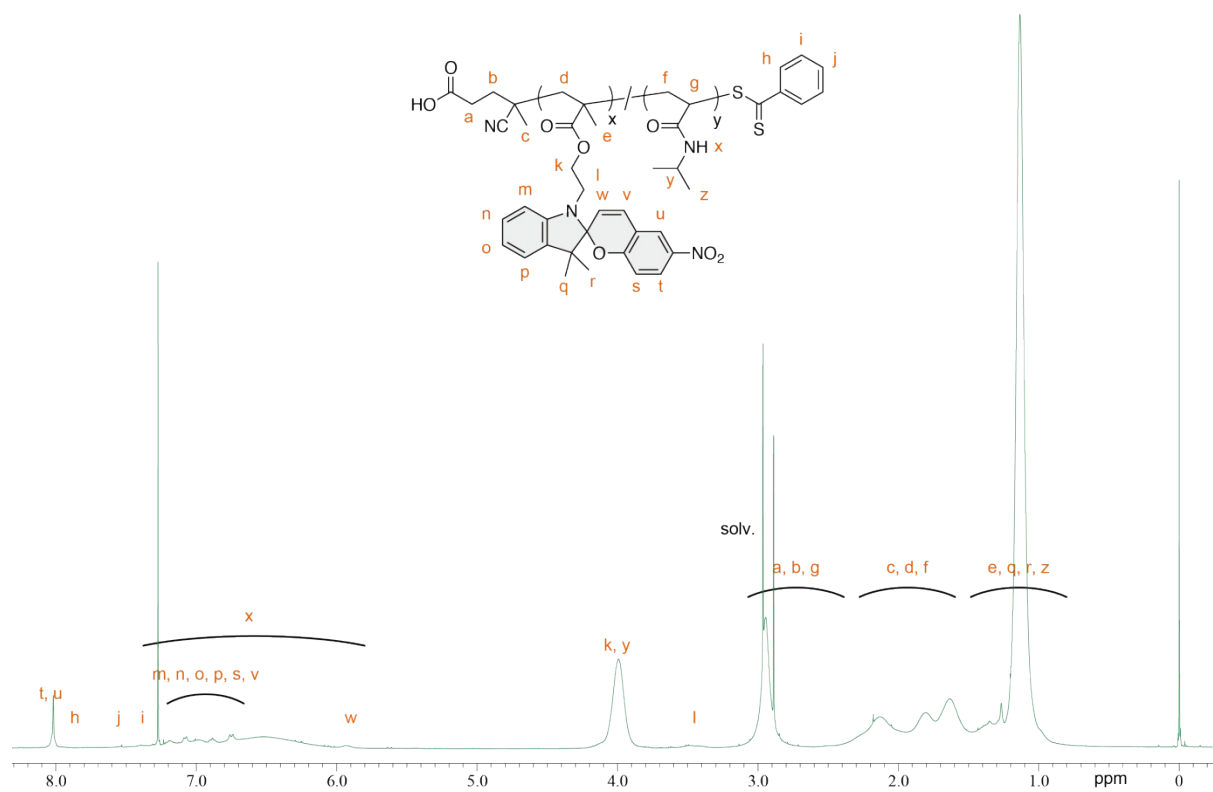

**Fig. S5**  $^1\text{H}$  NMR spectrum of **P4**.

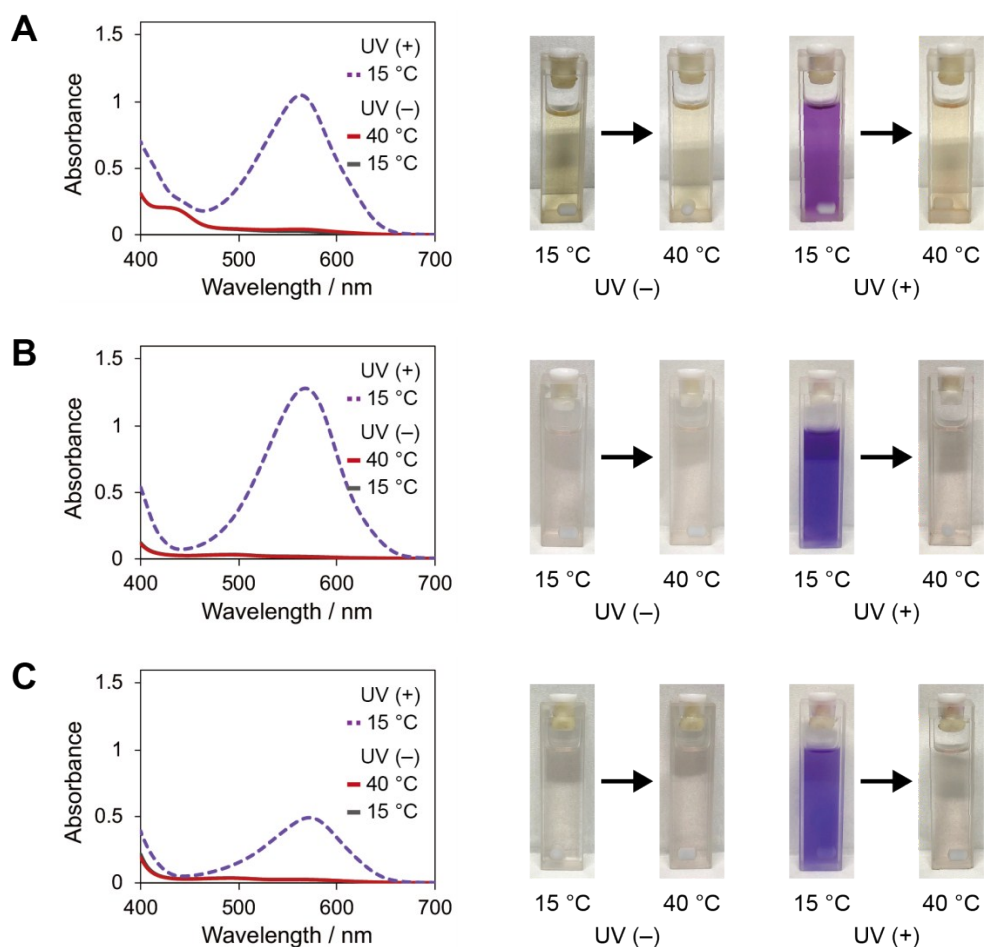

**Fig. S6** UV-vis absorption spectra and photographs of **P3** in organic solvents, (A) DMF, (B) THF, and (C) chloroform, at 15 °C and 40 °C before and after UV irradiation for 5 min.

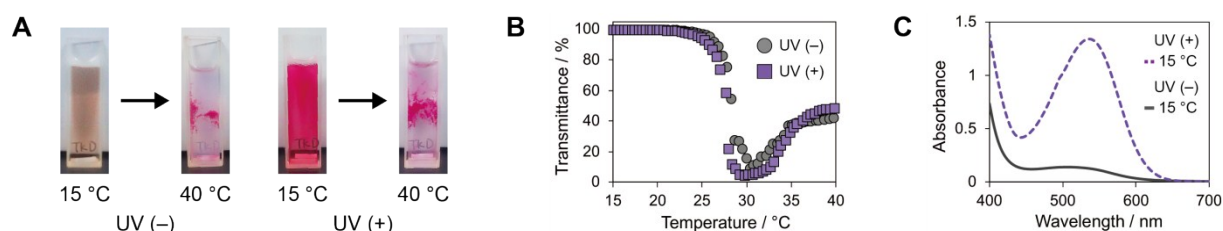

**Fig. S7** Thermoresponsive behavior of **P4** aqueous solutions with or without photostimulation. (A) **P4** aqueous solutions at 15 °C and 40 °C before and after UV irradiation for 5 min. (B) Transmittances of non-irradiated and UV-irradiated **P4** aqueous solutions at 700 nm during heating from 15 °C. (C) UV-vis absorption spectra of non-irradiated and UV-irradiated **P4** aqueous solutions at 15 °C.

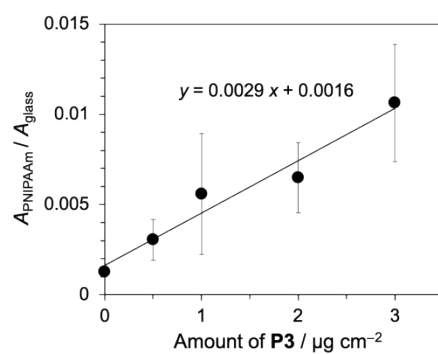

**Fig. S8** Calibration curve obtained by FT-IR measurements for estimating the amount of grafted **P3** on **S2–4** surfaces ( $n = 9$ ).

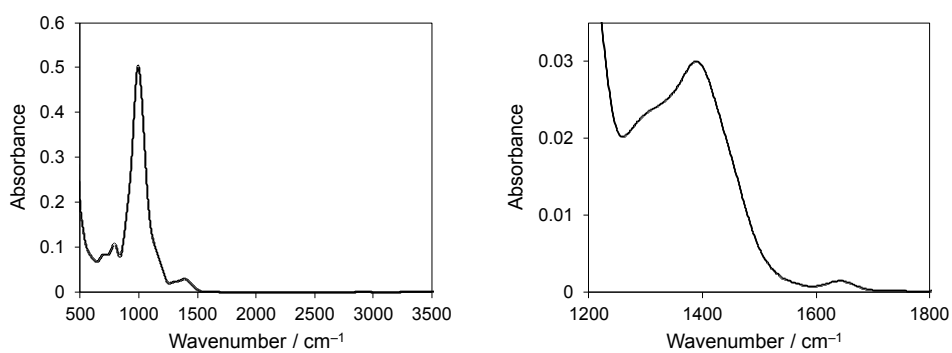

**Fig. S9** FT-IR spectra of **S3**.

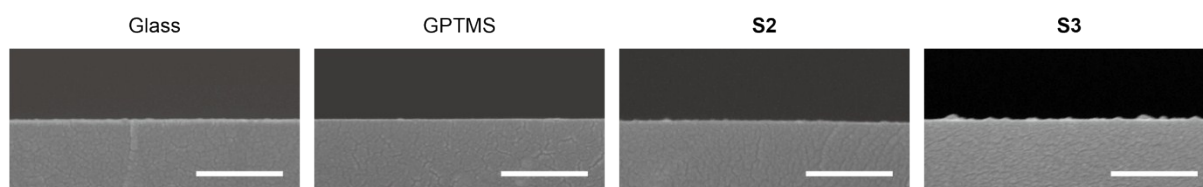

**Fig. S10** FE-SEM cross-sectional images of clean glass, GPTMS-modified substrates, **S2**, and **S3**.

Scale bars are 300 nm.

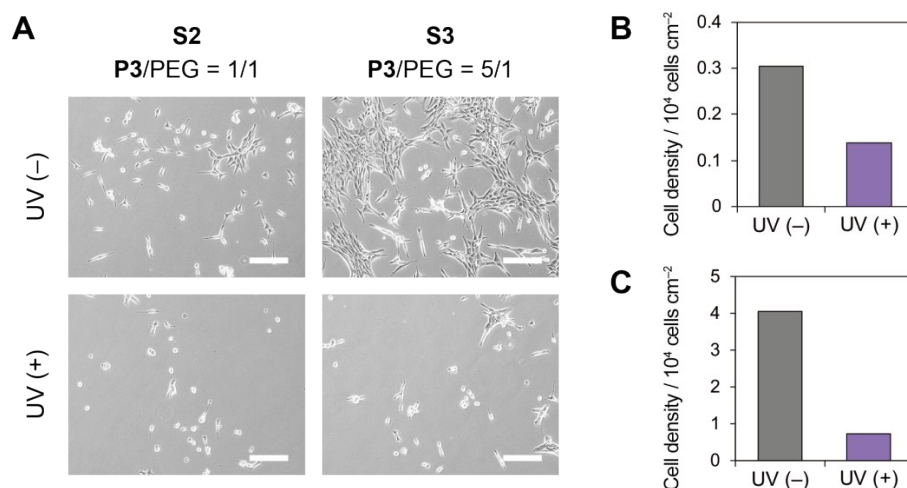

**Fig. S11** (A) Phase-contrast images of NIH3T3 cells cultured for 5 days on non-irradiated and UV-irradiated **S2** and **S3**. Scale bars are 200  $\mu\text{m}$ . Densities of NIH3T3 cells after 5 days culture on non-irradiated and UV-irradiated (B) **S2** and (C) **S3** ( $n = 1$ ).

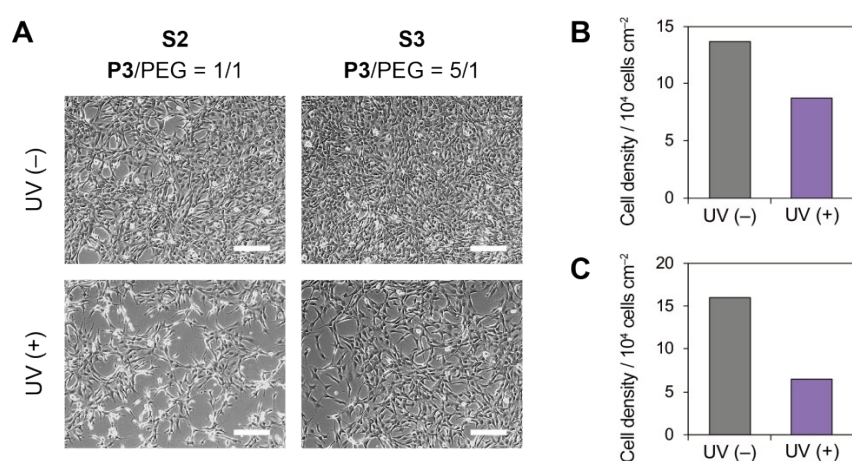

**Fig. S12** (A) Phase-contrast images of C2C12 cells cultured for 4 days on non-irradiated and UV-irradiated **S2** and **S3**. Scale bars are 200  $\mu\text{m}$ . Densities of C2C12 cells after 4 days culture on non-irradiated and UV-irradiated (B) **S2** and (C) **S3** ( $n = 1$ ).
